# Supplementary material
Source: PubMed Central journal article supplement (PMC8103308)
Supplement: NIHMS1614898-supplement-Supp_table_6.pdf [file NIHMS1614898-supplement-Supp_table_6.pdf]

| Day | Mn(ppm) | sample ID | axis1     | 0d_Mn35   | 0d_Mn0    | 0d_Mn300  | 14d_Mn35  | 14d_Mn0   | 14d_Mn300 |
|-----|---------|-----------|-----------|-----------|-----------|-----------|-----------|-----------|-----------|
| 0   | 35      | YAS0001   | 0.044764  | 0.118467  |           |           |           |           |           |
| 0   | 35      | YAS0002   | -0.194146 | -0.095488 |           |           |           |           |           |
| 0   | 35      | YAS0003   | -0.205472 | -0.274933 |           |           |           |           |           |
| 0   | 35      | YAS0004   | -0.182059 | -0.157639 |           |           |           |           |           |
| 0   | 35      | YAS0005   | -0.218918 | -0.469348 |           |           |           |           |           |
| 0   | 35      | YAS0006   | -0.154    | -0.481187 |           |           |           |           |           |
| 0   | 35      | YAS0007   | -0.125829 | 0.07081   |           |           |           |           |           |
| 0   | 35      | YAS0008   | -0.113297 | 0.077561  |           |           |           |           |           |
| 0   | 35      | YAS0009   | 0.110016  | -0.288796 |           |           |           |           |           |
| 0   | 35      | YAS0010   | 0.030794  | 0.098451  |           |           |           |           |           |
| 0   | 35      | YAS0011   | 0.027136  | 0.067936  |           |           |           |           |           |
| 0   | 35      | YAS0012   | -0.015267 |           | 0.094633  |           |           |           |           |
| 0   | 35      | YAS0013   | -0.033119 |           | 0.086554  |           |           |           |           |
| 0   | 35      | YAS0014   | -0.032271 |           | 0.128908  |           |           |           |           |
| 0   | 35      | YAS0015   | 0.445467  |           | 0.152799  |           |           |           |           |
| 0   | 35      | YAS0016   | -0.051428 |           | 0.035001  |           |           |           |           |
| 0   | 35      | YAS0017   | 0.079156  |           | 0.13646   |           |           |           |           |
| 0   | 35      | YAS0018   | 0.134456  |           | 0.221299  |           |           |           |           |
| 0   | 35      | YAS0019   | 0.238242  |           | 0.221273  |           |           |           |           |
| 0   | 35      | YAS0020   | 0.198138  |           | -0.039137 |           |           |           |           |
| 0   | 35      | YAS0021   | 0.264039  |           | 0.182147  |           |           |           |           |
| 0   | 35      | YAS0022   | -0.024993 |           | -0.048244 |           |           |           |           |
| 0   | 35      | YAS0023   | -0.020937 |           | -0.028396 |           |           |           |           |
| 0   | 35      | YAS0024   | 0.396793  |           | 0.207975  |           |           |           |           |
| 0   | 35      | YAS0025   | 0.297489  |           | -0.010186 |           |           |           |           |
| 0   | 35      | YAS0026   | 0.369875  |           |           | -0.28911  |           |           |           |
| 0   | 35      | YAS0027   | 0.29712   |           |           | 0.121846  |           |           |           |
| 0   | 35      | YAS0028   | -0.036683 |           |           | -0.007097 |           |           |           |
| 0   | 35      | YAS0029   | -0.005955 |           |           | 0.139713  |           |           |           |
| 0   | 35      | YAS0030   | 0.226658  |           |           | 0.179344  |           |           |           |
| 0   | 35      | YAS0031   | 0.011463  |           |           | 0.120329  |           |           |           |
| 0   | 35      | YAS0032   | -0.055084 |           |           | 0.14592   |           |           |           |
| 0   | 35      | YAS0033   | -0.281692 |           |           | 0.251997  |           |           |           |
| 0   | 35      | YAS0034   | -0.007277 |           |           | 0.245776  |           |           |           |
| 0   | 35      | YAS0035   | 0.214989  |           |           | 0.247675  |           |           |           |
| 14  | 35      | YAS0036   | -0.334989 |           |           |           | 0.021377  |           |           |
| 14  | 35      | YAS0037   | -0.282146 |           |           |           | -0.179571 |           |           |
| 14  | 35      | YAS0038   | -0.269107 |           |           |           | -0.021485 |           |           |
| 14  | 35      | YAS0039   | -0.377851 |           |           |           | -0.293091 |           |           |
| 14  | 35      | YAS0040   | -0.265062 |           |           |           | -0.000587 |           |           |
| 14  | 35      | YAS0041   | 0.53221   |           |           |           | 0.229402  |           |           |
| 14  | 35      | YAS0042   | 0.279454  |           |           |           | -0.290768 |           |           |
| 14  | 35      | YAS0043   | -0.194955 |           |           |           | 0.125624  |           |           |
| 14  | 35      | YAS0044   | -0.33188  |           |           |           | 0.229639  |           |           |
| 14  | 35      | YAS0045   | -0.095054 |           |           |           | 0.088451  |           |           |
| 14  | 35      | YAS0046   | -0.100495 |           |           |           | -0.116097 |           |           |
| 14  | 35      | YAS0047   | -0.0664   |           |           |           | -0.147157 |           |           |
| 14  | 0       | YAS0048   | -0.244473 |           |           |           |           | 0.107841  |           |
| 14  | 0       | YAS0049   | 0.275399  |           |           |           |           | -0.250786 |           |
| 14  | 0       | YAS0050   | 0.308494  |           |           |           |           | -0.179303 |           |
| 14  | 0       | YAS0051   | 0.242062  |           |           |           |           | -0.377215 |           |
| 14  | 0       | YAS0052   | 0.287506  |           |           |           |           | 0.059828  |           |
| 14  | 0       | YAS0053   | 0.109198  |           |           |           |           | -0.141116 |           |
| 14  | 0       | YAS0054   | -0.145957 |           |           |           |           | -0.232636 |           |
| 14  | 0       | YAS0055   | -0.321412 |           |           |           |           | -0.188102 |           |
| 14  | 0       | YAS0056   | -0.309001 |           |           |           |           | -0.036643 |           |
| 14  | 0       | YAS0057   | -0.243594 |           |           |           |           | -0.103421 |           |
| 14  | 0       | YAS0058   | -0.04307  |           |           |           |           | 0.245824  |           |
| 14  | 0       | YAS0059   | 0.034492  |           |           |           |           | -0.104544 |           |
| 14  | 0       | YAS0060   | 0.00419   |           |           |           |           | -0.071852 |           |
| 14  | 300     | YAS0061   | 0.057039  |           |           |           |           |           | -0.012792 |
| 14  | 300     | YAS0062   | -0.107952 |           |           |           |           |           | -0.006338 |
| 14  | 300     | YAS0063   | 0.019402  |           |           |           |           |           | -0.073293 |
| 14  | 300     | YAS0064   | -0.258482 |           |           |           |           |           | 0.179538  |
| 14  | 300     | YAS0065   | -0.014339 |           |           |           |           |           | 0.049696  |
| 14  | 300     | YAS0066   | 0.017929  |           |           |           |           |           | -0.027481 |
| 14  | 300     | YAS0067   | 0.152077  |           |           |           |           |           | 0.022432  |
| 14  | 300     | YAS0068   | 0.135631  |           |           |           |           |           | -0.047521 |
| 14  | 300     | YAS0069   | 0.118863  |           |           |           |           |           | 0.285203  |
| 14  | 300     | YAS0070   | -0.195896 |           |           |           |           |           | 0.093631  |
