# Supplementary material
Source: PubMed Central journal article supplement (PMC8103308)
Supplement: NIHMS1614898-supplement-Supp_tables_1-2.pdf [file NIHMS1614898-supplement-Supp_tables_1-2.pdf]

Supplemental Table 1: Diet composition (TD.120518, Teklad)

| <b>Dietary Components</b>                 | <b>g/Kg</b> |
|-------------------------------------------|-------------|
| Casein, low Cu & Fe                       | 200.0       |
| DL-Methionine                             | 3.0         |
| Sucrose                                   | 549.3452    |
| Corn Starch                               | 150.0       |
| Corn Oil                                  | 50.0        |
| Vitamin Mix, AIN-76A (40077)              | 14.0        |
| Choline Bitartrate                        | 2.8         |
| Ethoxyquin, antioxidant                   | 0.01        |
| Calcium Phosphate, dibasic                | 15.5        |
| Sodium Chloride                           | 2.59        |
| Potassium Citrate, monohydrate            | 7.7         |
| Potassium Sulfate                         | 1.82        |
| Magnesium Oxide                           | 0.84        |
| Zinc Carbonate                            | 0.056       |
| Cupric Carbonate                          | 0.0105      |
| Potassium Iodate                          | 0.0004      |
| Sodium Selenite, pentahydrate             | 0.0004      |
| Chromium Potassium Sulfate, dodecahydrate | 0.0193      |
| Manganous Carbonate                       | 0.0732      |
| Ferric Citrate                            | 0.235       |

Supplemental Table 2: Primer sequence

| No. | Primer name     | Sequence                          |
|-----|-----------------|-----------------------------------|
| 1   | <i>Cdh1</i>     | CCT GTC TTC AAC CCA AGC AC        |
|     |                 | CAA CAA CGA ACT GCT GGT CA        |
| 2   | <i>Nectin-1</i> | GGG ACC TAT CAC CTA CAG CC        |
|     |                 | CCA CTA TGA TCC CTC CGA CC        |
| 3   | <i>Cldn2</i>    | TTT TCC AAG GGC CTC TGG AT        |
|     |                 | AAG ACT CCA CCC ACT ACA GC        |
| 4   | <i>Cldn3</i>    | AAA TGT ACG ACT CGC TGC TG        |
|     |                 | CGA TGG TGA TCT TGG CCT TG        |
| 5   | <i>Cldn4</i>    | CAT CAG CAT CAT CGT GGG TG        |
|     |                 | TAG GGT TGT AGA AGT CGC GG        |
| 6   | <i>Cldn5</i>    | CGT TGT CCG CGA GTT CTA TG        |
|     |                 | CCT CCC GCC CTT AGA CAT AG        |
| 7   | <i>Cldn7</i>    | GCC TTG GTA GCA TGT TCC TG        |
|     |                 | TTT GCT TTC ACT GCC TGG AC        |
| 8   | <i>Cldn12</i>   | AAT GGG TGC CTT GCT ACT CT        |
|     |                 | AAG ACC GGC TCA AAC TTC CT        |
| 9   | <i>Cldn15</i>   | GCT TCC TGG GCC TCT TTC TA        |
|     |                 | CAG TAG TGA TGT TGA CGG CG        |
| 10  | <i>Ocl</i>      | CTA CGG AGG TGG CTA TGG AG        |
|     |                 | AGC GCT GAC TAT GAT CAC GA        |
| 11  | <i>Zo1</i>      | ACC CGA AAC TGA TGC TGT GGA TAG   |
|     |                 | AAA TGG CCG GGC AGA ACT TGT GTA   |
| 12  | <i>Zo2</i>      | GTT TGG CAG CTT GAA GGA CA        |
|     |                 | CTC ATT GTC AGT GTA GGC GC        |
| 13  | <i>Il1b</i>     | GCA GCA GCA CAT CAA CAA G         |
|     |                 | CAC GGG AAA GAC ACA GGT AG        |
| 14  | <i>Il10</i>     | TGA AGA CCC TCA GGA TGC G         |
|     |                 | TTC ACC TGC TCC ACT GCC TT        |
| 15  | <i>Il6</i>      | AGA CAA AGC CAG AGT CCT TCA GA    |
|     |                 | GCC ACT CCT TCT GTG ACT CCA       |
| 16  | <i>Tnfa</i>     | GCC ACC ACG CTC TTC TGT CT        |
|     |                 | CAG CTG CTC CTC CAC TTG GT        |
| 17  | <i>Cxcl1</i>    | CCG AAG TCA TAG CCA CAC TCA A     |
|     |                 | GCA GTC TGT CTT CTT TCT CCG TTA C |
| 18  | <i>Ccl2</i>     | GAA GGA ATG GGT CCA GAC AT        |
|     |                 | ACG GGT CAA CTT CAC ATT CA        |
| 19  | <i>Gapdh</i>    | ACA GCC GCA TCT TCT TGT GCA GTG   |
|     |                 | GGC CTT GAC TGT GCC GTT GAA TTT   |
